# Supplementary material
Source: PubMed Central journal article supplement (PMC3372701)
Supplement: NIHMS375193-supplement-1_si_001.pdf [file NIHMS375193-supplement-1_si_001.pdf]

## Supporting Information:

**Table S1.** Amino acid analysis of EMHP-CBD2 before and after crosslinking with HMDI.

|                     | Lys/Ala        | Asp/Ala         | Arg/Ala         | Ser/Ala         |
|---------------------|----------------|-----------------|-----------------|-----------------|
| Before crosslinking | $0.4 \pm 0.03$ | $0.1 \pm 0.004$ | $0.1 \pm 0.002$ | $0.1 \pm 0.01$  |
| After crosslinking  | $0.1 \pm 0.01$ | $0.1 \pm 0.03$  | $0.1 \pm 0.01$  | $0.1 \pm 0.004$ |

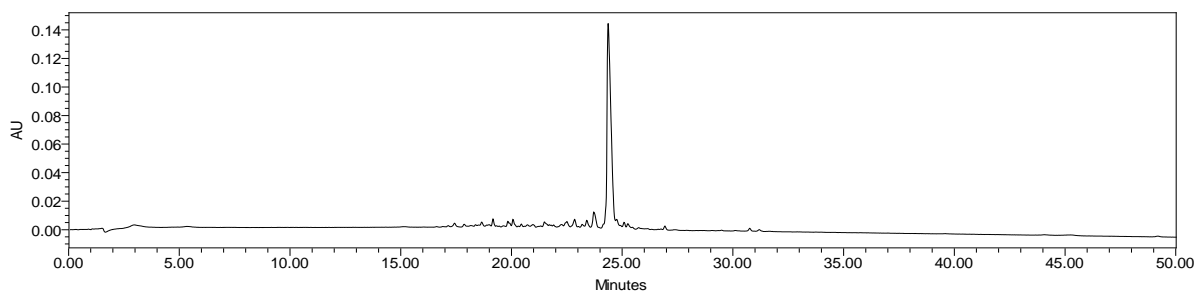

**Figure S1.** Analytical HPLC of X(AKAAAKA)<sub>2</sub>XGGRGDSPG, 5-55% acetonitrile gradient in water with 0.1% TFA. Detection at 214 nm.

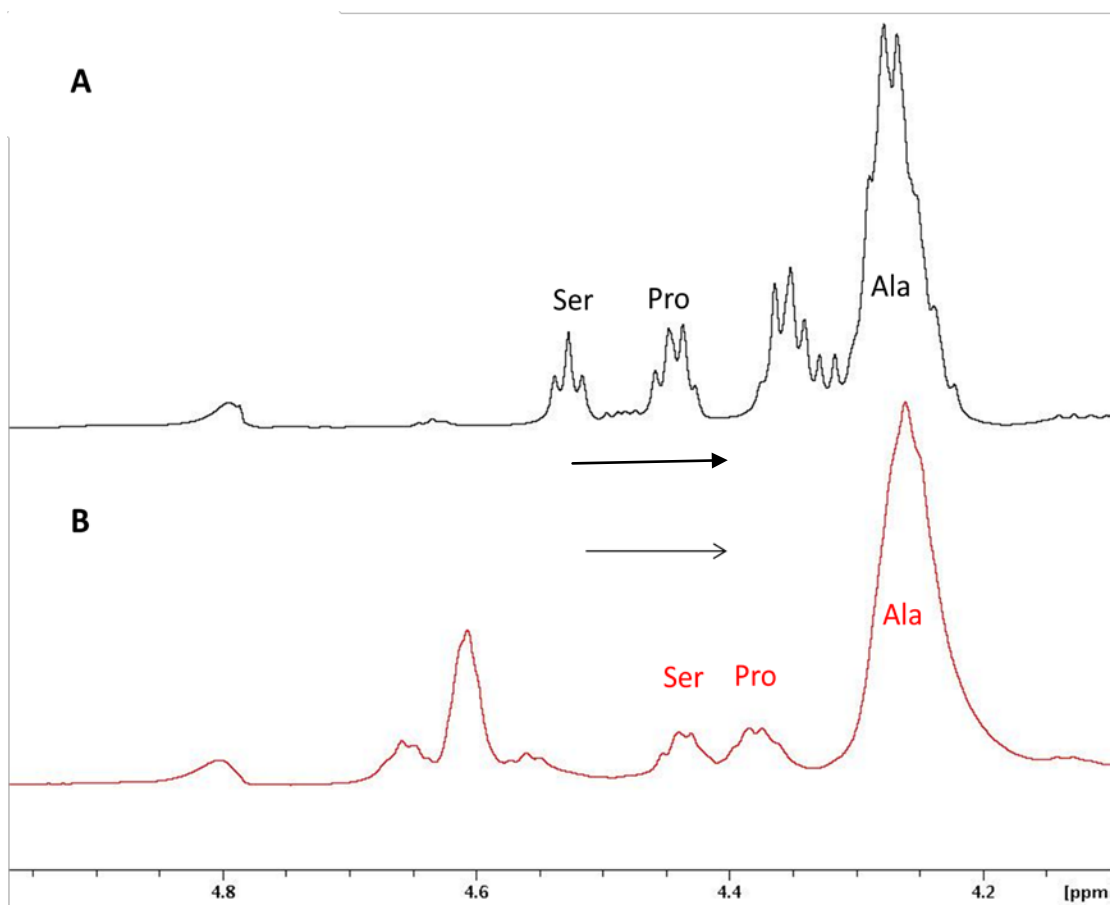

**Figure S2.** Peptide  $\alpha$ -CH regions from Figures 3A and 3B expanded from 4.1 to 5.0 ppm for AK2-CBD2 peptide (A, black) and EMHP-CBD2 (B, red).

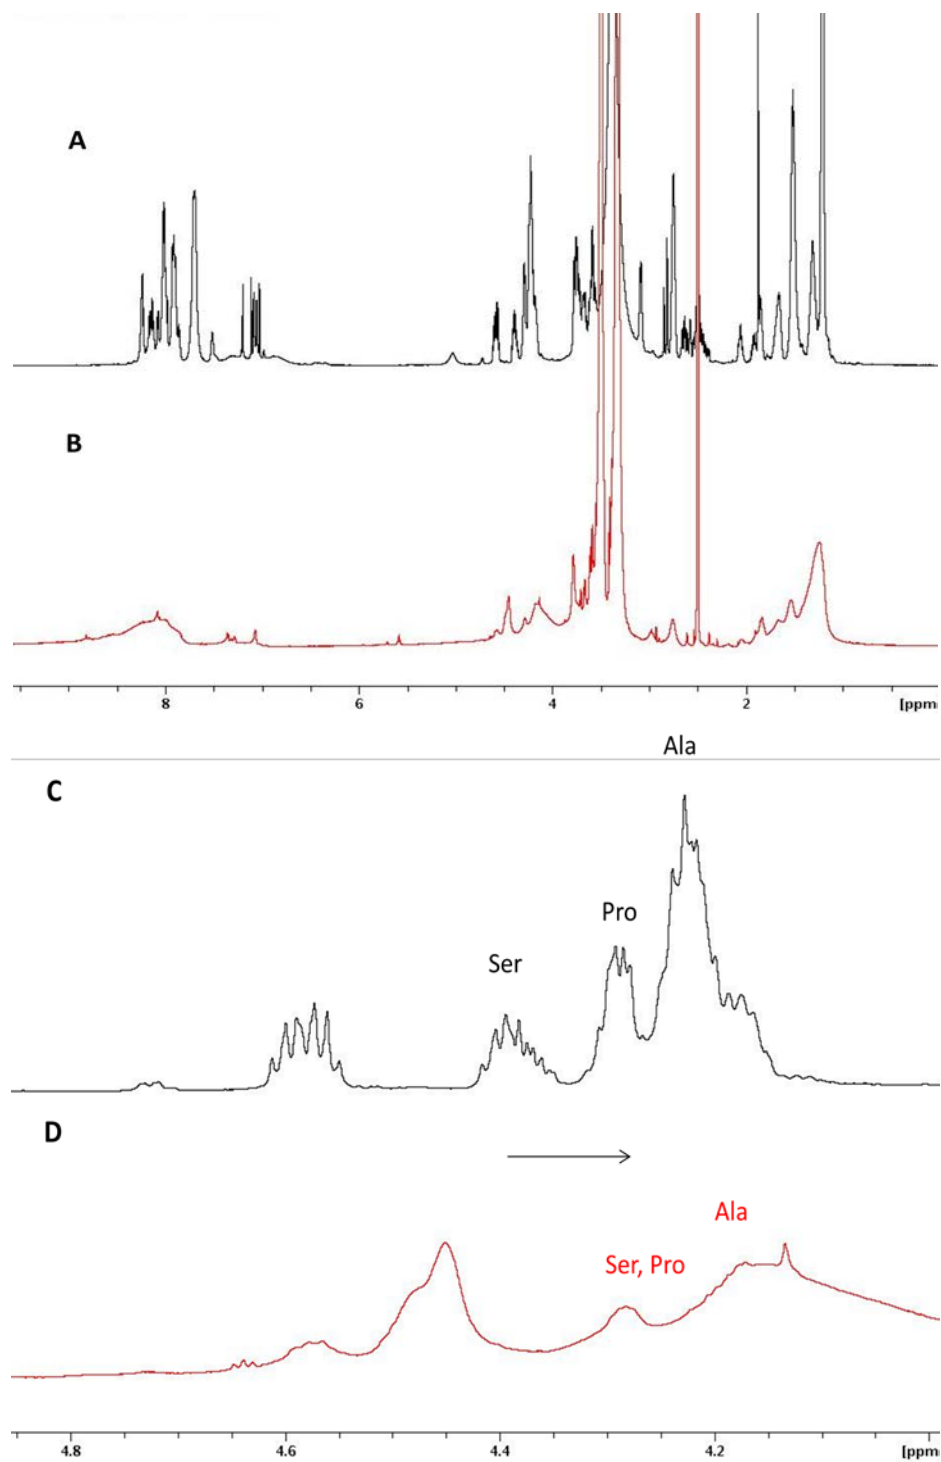

**Figure S3:**  $^1\text{H}$  NMR spectra in DMSO with water suppression by presaturation. A: AK2-CBD2 peptide (black); B: EMHP-CBD2 (red); C: Peptide  $\alpha$ -CH region expanded from 4.0 to 4.8 ppm for AK2-CBD2 peptide (black); D: Peptide  $\alpha$ -CH region expanded from 4.0 to 4.8 ppm for EMHP-CBD2 (red).
